# Supplementary material
Source: PubMed Central journal article supplement (PMC5304349)
Supplement: supp_tpc.16.00623_TPC2016-00623-RAR2_Supplemental_Data.pdf [file supp_tpc.16.00623_TPC2016-00623-RAR2_Supplemental_Data.pdf]

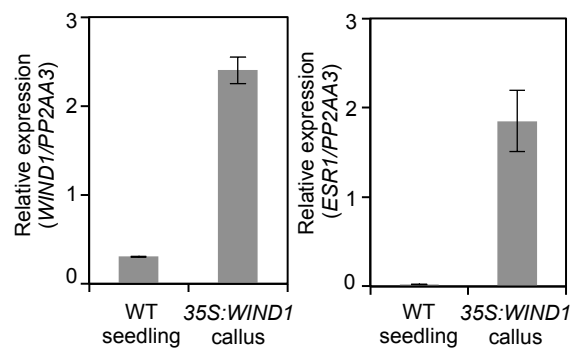

**Supplemental Figure 1. *ESR1* is up-regulated in callus induced by *WIND1* overexpression**

RT-qPCR analysis of *WIND1* (left panel) and *ESR1* (right panel) expression in 14-day-old wild-type (WT) seedlings and 35S:*WIND1* callus. Expression levels are normalised against those of the *PP2AA3* gene. Data are mean  $\pm$  SE (n = 3, biological replicates).

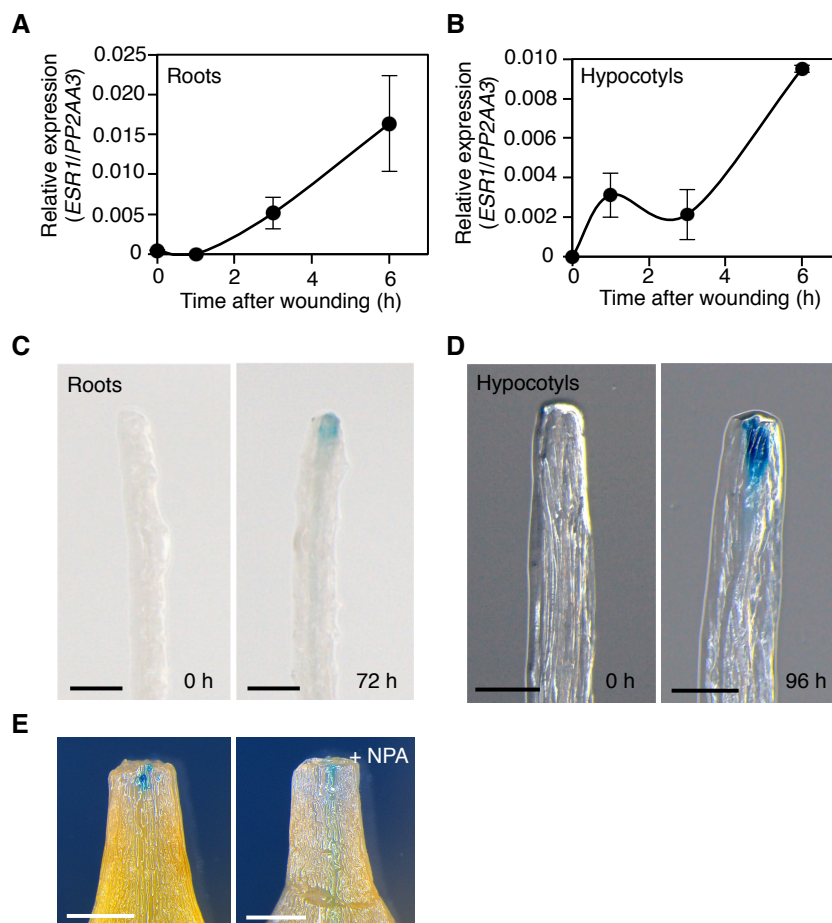

### Supplemental Figure 2. Wounding activates the *ESR1* expression in roots and hypocotyls.

(A, B) RT-qPCR analysis of *ESR1* expression in root (A) and hypocotyl (B) explants after wounding. 14-day-old, light-grown roots and 7-day-old, dark-grown hypocotyls were cut and their explants were cultured on phytohormone-free MS medium. The *ESR1* expression is increased within the few hours after wounding. Mean expression levels are normalized against those of *PP2AA3*. Data are mean  $\pm$  SE ( $n = 3$ , biological replicates). (C, D) Induction of the *ESR1* promoter activity in cut roots (C) and hypocotyls (D) of *Pro<sub>ESR1</sub>:GUS* plants as visualized by GUS staining. Representative images of root explants at 0 and 72 h and hypocotyl explants at 0 and 96 h after wounding are shown. (E) Inhibition of polar auxin transport by 1  $\mu$ M N-1-naphthylphthalamic acid (NPA) does not prevent the *ESR1* activation at wound sites. Representative images of petiole explants at 48 h after wounding are shown. Scale bars = 250  $\mu$ m in (C) and (D), and 500  $\mu$ m in (E).

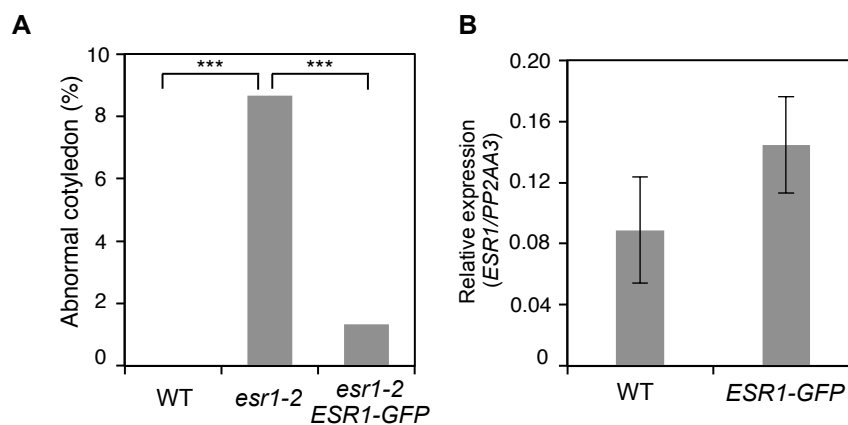

**Supplemental Figure 3. Characterization of  $Pro_{ESR1}:ESR1-GFP$  plants.**

(A) ESR1-GFP proteins, expressed by the *ESR1* promoter, complement the cotyledon phenotype in *esr1-2* mutants transformed with the  $Pro_{ESR1}:ESR1-GFP$  (*ESR1-GFP*) vector. The frequency of abnormal, i.e., single, triple or fused, cotyledons was scored in WT, *esr1-2* and *esr1-2* *ESR1-GFP* plants ( $n \geq 950$  per genotype). Statistical significance was determined by a proportion test ( $***p < 0.001$ ). (B) RT-qPCR analysis of *ESR1* expression in *ESR1-GFP* plants. Total RNA was extracted from wound sites of leaf explants at 3 h after wounding. Mean expression levels are normalized against those of *PP2AA3*. Data are mean  $\pm$  SE ( $n = 3$ , biological replicates).

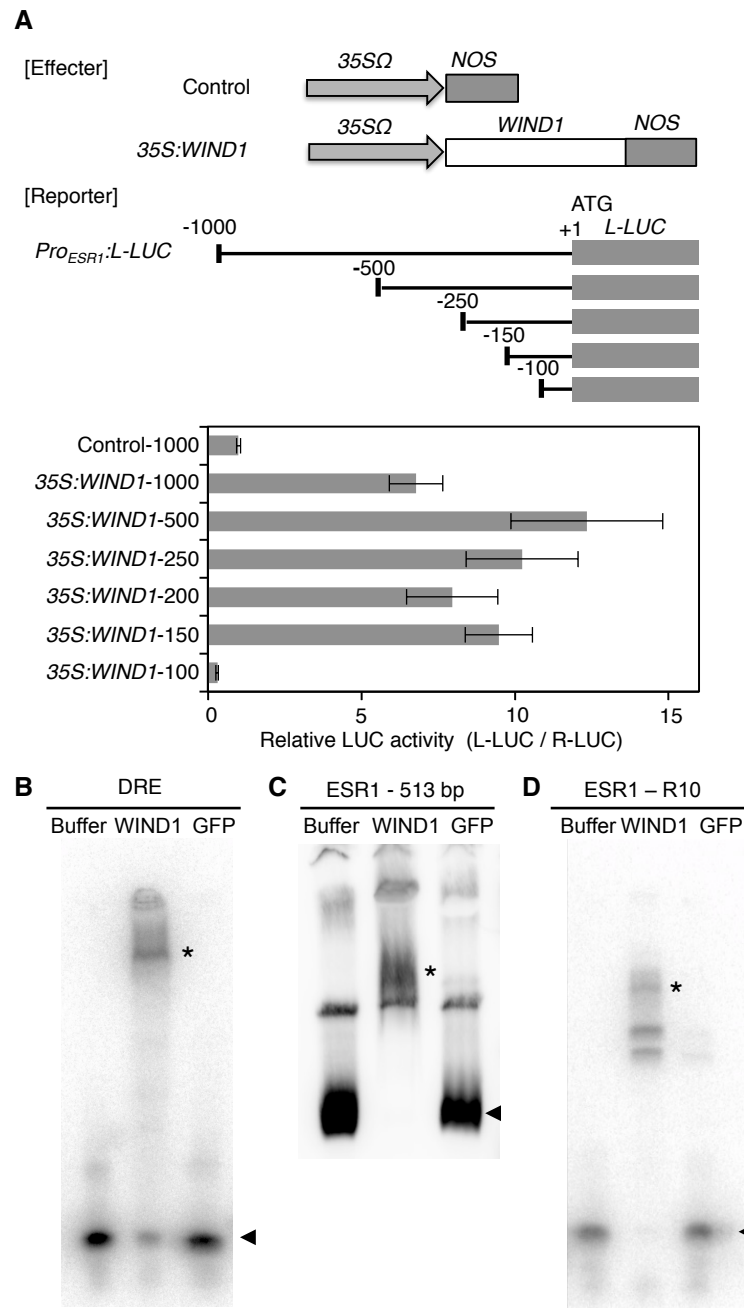

**Supplemental Figure 4. WIND1 directly binds the *ESR1* promoter *in vitro*.**

(A) WIND1-induced transient activation of *ESR1* expression in Arabidopsis culture cells. Co-bombardment of an effector construct,  $35S:WIND1$ , and a reporter construct,  $Pro_{ESR1}:L-LUC$ , causes reproducible induction of 1,000-bp *ESR1* promoter as judged by the relative luciferase activity. Promoter deletion analyses showed that the 150-bp promoter sequence is sufficient for the *ESR1* activation by WIND1. Data are mean  $\pm$  SE (n = 3, technical replicates).  $35S\Omega$ , cauliflower mosaic virus 35S promoter with the tobacco mosaic virus omega translation amplification sequence; NOS, *Agrobacterium* nopaline synthase transcriptional terminator; L-LUC, firefly luciferase; R-LUC, *Renilla* luciferase. (B) An EMSA shows that MBP-WIND1-His6 (WIND1) proteins bind the Dehydration Responsive Element (DRE) sequence, shifting the position of the DRE probe. (C) MBP-WIND1-His6 (WIND1) proteins bind the 513-bp promoter sequence of *ESR1*. (D) MBP-WIND1-His6 (WIND1) proteins bind the R10 sequence, located between -153 and -104 bp from the *ESR1* translational start site, *in vitro*. Arrowhead and asterisk show free and shifted DNA probes, respectively. Note that the incubation of these probes with buffer alone or MBP-GFP-His6 (GFP) proteins does not cause the same band shift, indicating that the band shift is caused by WIND1's binding to the probes. The DRE probe in (B) and ESR1 R10 probe in (D) were detected radioactively, and the 513-bp ESR1 probe in (C) was detected chemiluminescently.

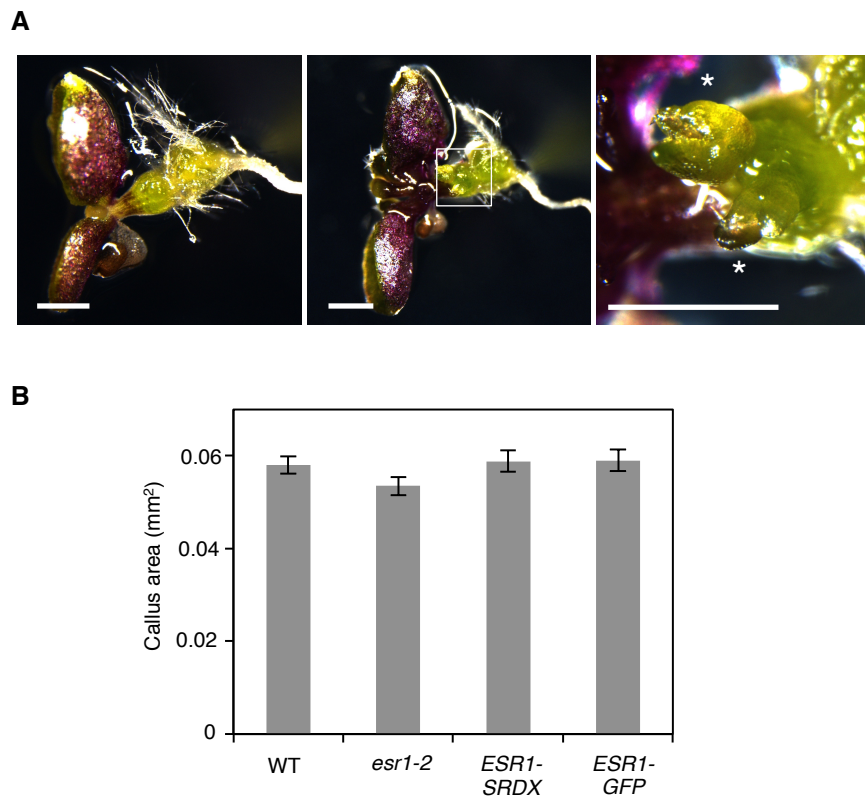

**Supplemental Figure 5. ESR1 overexpression induces callus with competency for shoot regeneration.**

(A) Callus that develop in unwounded *XVE-ESR1* plants regenerate shoots on SIM. (Left panel) Callus developing from unwounded *XVE-ESR1* plants cultured in the presence of 10  $\mu$ M 17 $\beta$ -estradiol. (Middle panel) Regenerating shoots from same *XVE-ESR1* plants after transfer to SIM. (Right panel) Magnified view of regenerating shoots. Asterisks mark regenerating shoots. (B) ESR1 is not required for *in vitro* callus formation. Root explants of WT, *esr1-2*, *ESR1-SRDX* and *ESR1-GFP* seedlings were cultured on CIM for 4 days and the projected area of callus was quantified. Data are mean  $\pm$  SE (n = 9 per genotype). Scale bars = 500  $\mu$ m in (A).

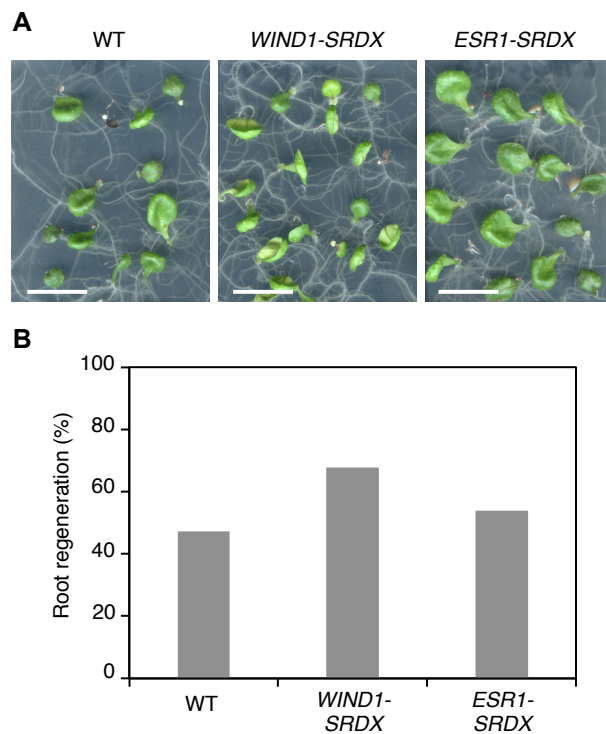

**Supplemental Figure 6. WIND1 and ESR1 are not required for root regeneration from leaf explants.**

(A) Root regeneration at wound sites of WT, *WIND1-SRDX* and *ESR1-SRDX* leaf explants. Leaf explants were cultured on phytohormone-free MS medium and root regeneration phenotypes were recorded 20 days after wounding. (B) Quantitative analysis of root regeneration phenotypes at 10 days after wounding. Data are shown as frequency (%) of explants regenerating roots ( $n \geq 20$  per genotype). Scale bars = 10 mm in (A).

| Name                          | Sequence                                                       |
|-------------------------------|----------------------------------------------------------------|
| <b>PRIMERS FOR GENOTYPING</b> |                                                                |
| ESR1f                         | ATGGA AAAAGCCTTGAGAACTTC                                       |
| Spm8                          | GTTTTGGCCGACACTCCTTAC                                          |
| ESR1r                         | CTATCCCACGATCTTCGGCAAGT                                        |
| ESR1 Cf                       | CGGTGGTTTATCGTTGGGATCA                                         |
| GFP Nr                        | TTGAAGTCGATGCCCTTCAG                                           |
| SRDXr                         | AGCGAAACCCAAACGGAGTTCTAG                                       |
| <b>PRIMERS FOR CLONING</b>    |                                                                |
| ESR1 XVE Xhof                 | ACGTTAATTAATGAAAAAGCCTTGAGAACTT                                |
| ESR1 XVE SpeI                 | AACCACTAGTCTATCCCACGATCTTCGGCAAGTA                             |
| ESR1 Genome Spelf             | AGGACTAGTTTAAACAGTATAAAAACAGTTATCATTT                          |
| ESR1 Genome Smalr             | AAATCCCGGGTCCCCACGATCTTCGGCAAGTACAGCCT                         |
| ESR1pro1000 WT SacII          | TCCCCGCGGCGACCCATTACAACGCTAT                                   |
| ESR1pro500 WT SacII           | TCCCCGCGGTGTGAAATGACTGTTGGTCGAT                                |
| ESR1pro250 WT SacII           | TCCCCGCGGTTTTAAGTGCAACTCAAAAAGTTTC                             |
| ESR1pro200 WTSacII            | TCCCCGCGGTACTATACTGTATGTGCAA                                   |
| ESR1pro150 WT SacII           | TCCCCGCGGCAAACTTCACAAAATTTAAT                                  |
| ESR1p150 m1 SacII             | TCCCCGCGGCAAACTTCACCTTGCTTAATTAAGCAAGTATACCATTATGTACCTATAAATAG |
| ESR1p150 m2 SacII             | TCCCCGCGGCAAACTTCACCTTGCTTAATTAATTTTATACCATTATGTATGTA          |
| ESR1p150 m3 SacII             | TCCCCGCGGCAAACTTCACAAAATTTAATTAAGCAAGTATACCATTATGTACCTATAAATAG |
| ESR1p150m4 SacII              | TCCCCGCGGCAAACTTCACGTTGACAGTAAGTGAACCTATACCATTATGTACCTATAAATAG |
| ESR1p150m5 SacII              | TCCCCGCGGAAAAATTAAAAAATTTAATTAATTTTATACCATTATGTACCTATAAATAG    |
| ESR1pro100 WTSacII            | TCCCCGCGGATAGATAGAAGAAGTCCAT                                   |
| ESR1pro SpeI                  | GGACTAGTTTTTGGTTCTAGGGTTTTG                                    |
| <b>PRIMERS FOR RT-qPCR</b>    |                                                                |
| ESR1 Rf                       | ACAGCTGTCATTATGCCTGAACCA                                       |
| ESR1 Rr                       | GGTAGAGGAATCTAACGGTAGAGA                                       |
| at1G12980Rf1                  | CGGTGGTTTATCGTTGGGATCA                                         |
| at1G12980Rr1                  | CAGCCTAACTGAGTCCGTACA                                          |
| WIND1 Rf                      | GATCTCACATCGGAGCGGATT                                          |
| WIND1 Rr                      | CCACCGATCGAAACCGAATTC                                          |
| PP2AA3 Rf                     | GACCAAGTGAACCAAGTTATTGG                                        |
| PP2AA3 Rr                     | TACTCTCCAGTGCCTGCTTCA                                          |
| ARR5 Rf                       | CATCTGCTCGTATCGATAG                                            |
| ARR5 Rr                       | GCTTCAAGCTCTCTTTGTGCA                                          |
| ESR2 Rf                       | GCTGACTTCCATGTCGAAGGA                                          |
| ESR2 Rr                       | TCTGCTGCATCTTAGCTGAATC                                         |
| CUC1 Rf                       | CAGCAGCAGCAGCGTTCTTT                                           |
| CUC1 Rr                       | AATGACGGAGGAGGAGGAAGAA                                         |
| WUS Rf                        | GCAAAGCCTCTGTTGGTCTAGAA                                        |
| WUS Rr                        | AGCGTACGTCGATGTTCCAGATA                                        |
| STM Rf                        | CCTTACCCTTCGGAGCAACAA                                          |
| STM Rr                        | TCCAATGCCGTTTCTCTGGTTTA                                        |
| PLT3 Rf                       | GACTCGACCGGTCTAACAA                                            |
| PLT3 Rr                       | CAGCCGGATTTGGTGCCATAA                                          |
| PLT5 Rf                       | GTCGATGGCAGGCACGAATT                                           |
| PLT5 Rr                       | TGCAGCTTCCCTTTGAGTGCTAAA                                       |
| PLT7 Rf                       | GGTGTACAAGGCATCATCAACAA                                        |
| PLT7 Rr                       | GTTGCAAAAGTTCCGAGGTAAAGA                                       |
| PLT1 Rf                       | AGCACTGAGGAAGAAGCAGCAGA                                        |
| PLT1 Rr                       | CCGGTTGATCTCGAAGTTGGTCAC                                       |
| PLT2 Rf                       | GGCCGAGTTGCTGGAAACAAAGAT                                       |
| PLT2 Rr                       | TGCTTCTTCCCTCCGTGCTGAATG                                       |
| RAP2.6L Rf                    | ACGCTCAGTTGCTTACGAGTAACA                                       |
| RAP2.6L Rr                    | TGCGTCTGTTGGGAGGAAGAA                                          |
| <b>PRIMERS FOR CHIP-qPCR</b>  |                                                                |
| ESR1p P1f                     | CACCATTTACTCTGTCTTTCA                                          |
| ESR1p P1r                     | ATGGGAGAGTTGGAGTCGTT                                           |
| ESR1p P2f                     | CTCAAATGATGGTAGTAATTA AAC                                      |
| ESR1p P2r                     | GTCTATTAGACAATATAAGAATT                                        |
| ESR1p P3f                     | GGCAGTTTTAGAAATAATGGAATT                                       |
| ESR1p P3r                     | CATTTAAATTTACTTGCTATCTTG                                       |
| ESR1p P4f                     | ACAGCTGTCATTATGCCTGAACCA                                       |
| ESR1p P4r                     | GGTAGAGGAATCTAACGGTAGAGA                                       |
| ESR1p P5f                     | CGGTGGTTTATCGTTGGGATCA                                         |
| ESR1p P5r                     | CAGCCTAACTGAGTTCCGTACA                                         |

Supplemental Table 1. A list of PCR primers used in this study.

| Probe name | Name of the oligonucleotide   | Sequence                                            |
|------------|-------------------------------|-----------------------------------------------------|
| DRE        | DRE element probe s           | TTGATACTACCGACATGAGTTGATACTACCGACATGAGTT            |
|            | DRE element probe antisense a | AACTCATGTCGGTAGTATCAACTCATGTCGGTAGTATCAA            |
| ESR1-513bp | ESR1 -513s                    | CATGTGTGAAATGACTGTTGGTCG                            |
|            | [Bio-ON]ESR1+3as              | [Bio-ON]CATTTTTGGTTTCTAGGGTTTTGGTTTG                |
| R1         | ESR1 -513to-464s              | CATGTGTGAAATGACTGTTGGTCGATTTTTAACTTTAATAAATAAAAAAG  |
|            | ESR1 -513to-464as             | CTTTTTTATTTATTAAGTTAAAAATCGACCAACAGTCATTTACACATG    |
| R2         | ESR1 -473to-424s              | AATAAAAAAGCAATAAGAACGTGGTTTTATTTTCGCCACTCCCACCTGCAT |
|            | ESR1 -473to-424as             | ATGCAAGTGGGAGTGGCGAAAATAAACACAGTCTTATATGCTTTTTTATT  |
| R3         | ESR1 -433to-384s              | CCACTTGCATCGTCATCATCAAAGAAAAACACTAATGTCTAGACCAAAGA  |
|            | ESR1 -433to-384as             | TCTTTGGTCTAGACATTAGTGTTTTTCTTTGATGATGACGATGCAAGTGG  |
| R4         | ESR1 -393to-344s              | AGACCAAAGATTTAAAACATCTACCCCATATATATGATGAACAAGATA    |
|            | ESR1 -393to-344as             | TATCTTGTTCATCATATATATATGGGGTAGATGTTTTAAATCTTTGGTCT  |
| R5         | ESR1 -353to-304s              | GAACAAGATAGCAAGTAAATTTAAATGTAATAATTAATTTAGTTTGCTA   |
|            | ESR1 -353to-304as             | TAGCAAACATAAAATTTAATTTTACATTTAAATTTACTTGCTATCTTGTTT |
| R6         | ESR1 -313to-264s              | TAGTTTGCTAAGATTAATATACAAAAGAGTATTATCAATTTATCAGTTA   |
|            | ESR1 -313to-264as             | TAAC TGATAAATGATAATACTTCTTTTGTATATTAATCTTAGCAAACATA |
| R7         | ESR1 -273to-224s              | TTATCAGTTATTAATCAAATCAAGTTTTAAGTGCAACTCAAAGTTTCCA   |
|            | ESR1 -273to-224as             | TGGAACCTTTTGAGTTGCACCTAAAACCTTGATTTGATTAATAACTGATAA |
| R8         | ESR1 -233to-18 s              | AAAGTTTCCATGCTTATATAGTTATTTGTATACTACTATCTGTATGTGC   |
|            | ESR1 -233to-184as             | GCACATACAGTATAGTAGTATACAAAATAACTATATAAGCATGGAAACTTT |
| R9         | ESR1 -193to-144s              | CTGTATGTGCAAGAAAAGCATTTATACTCTTCGCCATATATTTCAAACCTT |
|            | ESR1 -193to-144as             | AAGTTTGAAATATATGGCGAAGAGTATAAATGCTTTTCTTGACATACAG   |
| R10        | ESR1 -153to-104s              | TTTCAAACCTTCACAAAATTTAATTAATTTTATACCATTTATGTACCTA   |
|            | ESR1 -153to-104as             | TAGGTACATAAATGGTATAAAAAATTTAATTAATTTTGTGAAGTTTGAAA  |
| R11        | ESR1 -113to-64s               | TATGTACCTATAAATAGATAGAAGAAGCTCCATCTCTTTCAAACATACAA  |
|            | ESR1 -113to-64as              | TTGATAGTTTGAAGAGATGGAGCTTCTTCTATCTATTTATAGGTACATA   |

**Supplemental Table 2.** A list of oligonucleotides used in EMSA.
